# Supplementary material
Source: HighWire-hosted journal article supplement (https://oem.bmj.com/content/80/6/312)
Supplement: inline-supplementary-material-1 [file inline-supplementary-material-1.pdf]

**Supplemental Table 1. Military occupational job titles in each occupation/occupational group**

| <b>Occupation</b>                      | <b>AFSC</b> | <b>Military occupational job title</b>                                                                                                                                                                                                                                                                                                                                                                                                                                                                                                                                                                                                                                                                                                                                                                                                                                                                                                                                                                                                                                                                                                                                                                                                                                                                                                                                                                                                                                                                                                                                                                                                                                                                                                                                                                                                                                                                                                                                                                                                                      |
|----------------------------------------|-------------|-------------------------------------------------------------------------------------------------------------------------------------------------------------------------------------------------------------------------------------------------------------------------------------------------------------------------------------------------------------------------------------------------------------------------------------------------------------------------------------------------------------------------------------------------------------------------------------------------------------------------------------------------------------------------------------------------------------------------------------------------------------------------------------------------------------------------------------------------------------------------------------------------------------------------------------------------------------------------------------------------------------------------------------------------------------------------------------------------------------------------------------------------------------------------------------------------------------------------------------------------------------------------------------------------------------------------------------------------------------------------------------------------------------------------------------------------------------------------------------------------------------------------------------------------------------------------------------------------------------------------------------------------------------------------------------------------------------------------------------------------------------------------------------------------------------------------------------------------------------------------------------------------------------------------------------------------------------------------------------------------------------------------------------------------------------|
| Aircrew operations                     | 1A          | Airborne Cryptologic Linguist Craftsman;<br>Airborne Cryptologic Language Analyst Helper;<br>Airborne Battle Management Systems Craftsman, Weapons Director;<br>Airborne Mission Systems Specialist Journeyman/ Craftsman/Superintendent;<br>Airborne Missions Systems Journeyman/Craftsman;<br>Aircraft Loadmaster Apprentice/Journeyman/Craftsman;<br>Airborne Operations Journeyman;<br>Flight Engineer Craftsman;<br>In-Flight Refueling Specialist Helper/Apprentice Craftsman; Flight Engineer Craftsman;<br>Special Mission Aviator Craftsman                                                                                                                                                                                                                                                                                                                                                                                                                                                                                                                                                                                                                                                                                                                                                                                                                                                                                                                                                                                                                                                                                                                                                                                                                                                                                                                                                                                                                                                                                                        |
| Command and control systems operations | 1C          | Air Traffic Control Helper/Apprentice/Journeyman/Craftsman/Manager;<br>Command and Control Battle Management Operations Apprentice/Journeyman/Craftsman;<br>Command and Control Operations Craftsman;<br>Combat Control Helper/Journeyman/Craftsman/Superintendent;<br>Command and Control Battle Management Operations Craftsman, Weapons Director;<br>Space Systems Operations Journeyman;<br>Tactical Air Control Party Apprentice/Journeyman/Craftsman                                                                                                                                                                                                                                                                                                                                                                                                                                                                                                                                                                                                                                                                                                                                                                                                                                                                                                                                                                                                                                                                                                                                                                                                                                                                                                                                                                                                                                                                                                                                                                                                  |
| Aerospace maintenance                  | 2A          | A-10, F-15, and U-2 Avionics Systems Helper/Apprentice/Journeyman, Attack Control;<br>A-10, F-15, and U-2 Avionics Systems Helper/Journeyman, Communication, Navigation, And Penetration Aids;<br>Aircrew Egress Systems Apprentice/Journeyman/Craftsman;<br>Aircraft Metals Technology Craftsman;<br>Airborne Surveillance Radar Systems Craftsman;<br>Aircraft Electrical And Environmental Systems Helper/Journeyman/Craftsman;<br>Electronic Warfare Systems;<br>Integrated Avionics Systems (Heavy) Craftsman, Communication, Navigation, and Mission;<br>Integrated Avionics Systems (Attack/Special) Journeyman;<br>Bomb-navigation Systems;<br>Bomber/Special Electronic Warfare and Radar Surveillance Integrated Avionics Craftsman;<br>Mobility Air Forces Integrated Communication/Navigation/Mission Systems Craftsman, Tanker Comm/Counter/Nav Systems;<br>Mobility Air Forces Integrated Communication/Navigation/Mission Systems Craftsman, Cargo Comm/Counter/Nav Systems<br>Integrated Avionics Systems (Heavy) Helper/Journeyman/Craftsman, Instrument And Flight Controls;<br>Integrated Avionics Systems (Heavy) Journeyman/Craftsman, Communication, Navigation, and Mission;<br>Integrated Avionics Systems (Attack/Special) Journeyman;<br>Avionics Test Station And Components Journeyman/Craftsman, Electronic Warfare Systems, All Helicopters and Aircraft;<br>Avionics Test Station And Components Helper, Avionics Systems;<br>Avionics Test Station And Components Helper/Craftsman, Avionics Systems, F-15;<br>Avionics Test Station And Components Apprentice, Avionics Sensor Systems, All;<br>Avionics Test Station And Components Helper, Avionics Sensor Systems and Electronic Warfare Systems;<br>Avionic Sensors Maintenance Apprentice;<br>Avionics Guidance And Control Systems Craftsman;<br>Helicopters and Aircraft;<br>Aircraft Fuel Systems Apprentice/Journeyman/Craftsman;<br>Aerospace Maintenance Helper, C-18/C-135/E-3/VC-25/VC-137;<br>Airlift/Special Mission Aircraft Maintenance Apprentice, C-17; |

|                                                    |    |                                                                                                                                                                                                                                                                                                                                                                                                                                                                                                                                                                                                                                                                                                                                                                                                                                                                                                                                                                                                                                                                                                                                                                                                                                                                                                                                                                                                                                                                                                                                                                                                                                                                                                                                                                                                                                                                                                                                                                                                                                      |
|----------------------------------------------------|----|--------------------------------------------------------------------------------------------------------------------------------------------------------------------------------------------------------------------------------------------------------------------------------------------------------------------------------------------------------------------------------------------------------------------------------------------------------------------------------------------------------------------------------------------------------------------------------------------------------------------------------------------------------------------------------------------------------------------------------------------------------------------------------------------------------------------------------------------------------------------------------------------------------------------------------------------------------------------------------------------------------------------------------------------------------------------------------------------------------------------------------------------------------------------------------------------------------------------------------------------------------------------------------------------------------------------------------------------------------------------------------------------------------------------------------------------------------------------------------------------------------------------------------------------------------------------------------------------------------------------------------------------------------------------------------------------------------------------------------------------------------------------------------------------------------------------------------------------------------------------------------------------------------------------------------------------------------------------------------------------------------------------------------------|
|                                                    |    | <p>Airlift/Special Mission Aircraft Maintenance Craftsman/Superintendent;<br/> Airlift/Special Mission Aircraft Maintenance Helper/Journeyman, C-130/C-27J;<br/> Tactical Aircraft Maintenance Apprentice/Journeyman, F-15;<br/> Tactical Aircraft Maintenance Craftsman;<br/> Tactical Aircraft Maintenance Journeyman/Craftsman, F-16/F-117;<br/> Tactical Aircraft Maintenance Craftsman/Journeyman, General (except F-15/F-16);<br/> Tactical Aircraft Maintenance Helper, F-16;<br/> Tactical Aircraft Maintenance Journeyman, A-10/U-2;<br/> Remotely Piloted Aircraft Maintenance Journeyman, MQ-1/MQ-9<br/> Helicopter/Tiltrotor Aircraft Maintenance Journeyman/Craftsman;<br/> Aerospace Propulsion Craftsman;<br/> Aerospace Propulsion Craftsman/Journeyman, Turboprop and Turboshaft Propulsion;<br/> Aerospace Propulsion Journeyman, F100, F101, F110, F118, F119, F135 Jet Engines;<br/> Aerospace Propulsion Journeyman, Jet Engines;<br/> Aerospace Maintenance Helper/Apprentice, C-18/C-135/E-3/VC-25/VC-137;<br/> Aerospace Maintenance Journeyman;<br/> Aerospace Maintenance Journeyman, All C-135/C-18/E-3/E-4/KC-10/ VC-25/VC-137;<br/> Aerospace Maintenance Journeyman, B-1/B-2/B-52;<br/> Aerospace Maintenance Journeyman, C-5/C-9/C-12/C-17/C-20/C-21/C-22/ C 26/C-27/C-130/T-39/T-43;<br/> Aircraft Structural Maintenance Apprentice/Journeyman/Craftsman;<br/> Low Observable Aircraft Structural Maintenance Journeyman;<br/> Aerospace Propulsion Journeyman, Jet Engines;<br/> Refuel/Bomber Aircraft Maintenance Craftsman;<br/> Refuel/Bomber Aircraft Maintenance Journeyman, Any C-135/E-3/E-8;<br/> Aircraft Hydraulic Systems Craftsman;<br/> Aerospace Ground Equipment Helper/Apprentice/Journeyman/Craftsman/Superintendent;<br/> Nondestructive Inspection Journeyman/Craftsman;<br/> Survival Equipment Journeyman;<br/> Aircraft Guidance And Control Systems Apprentice/Craftsman;<br/> Aircraft Fabrication Superintenden;<br/> Communication And Navigation Systems Craftsman</p> |
| Fuels                                              | 2F | Fuels Apprentice/Journeyman/Craftsman                                                                                                                                                                                                                                                                                                                                                                                                                                                                                                                                                                                                                                                                                                                                                                                                                                                                                                                                                                                                                                                                                                                                                                                                                                                                                                                                                                                                                                                                                                                                                                                                                                                                                                                                                                                                                                                                                                                                                                                                |
| Material management                                | 2S | <p>Materiel Management Apprentice/Journeyman/Craftsman;<br/> Supply Systems Analysis Apprentice</p>                                                                                                                                                                                                                                                                                                                                                                                                                                                                                                                                                                                                                                                                                                                                                                                                                                                                                                                                                                                                                                                                                                                                                                                                                                                                                                                                                                                                                                                                                                                                                                                                                                                                                                                                                                                                                                                                                                                                  |
| Transportation                                     | 2T | <p>Air Transportation Helper/Apprentice/Journeyman/Craftsman/Superintendent;<br/> Ground Transportation Apprentice/Journeyman/Craftsman;<br/> Mission Generation Vehicular Equipment Maintenance Apprentice/Journeyman;<br/> Traffic Management Journeyman/Craftsman;<br/> Vehicle And Vehicular Equipment Maintenance Craftsman;<br/> Vehicle Body Maintenance Journeyman</p>                                                                                                                                                                                                                                                                                                                                                                                                                                                                                                                                                                                                                                                                                                                                                                                                                                                                                                                                                                                                                                                                                                                                                                                                                                                                                                                                                                                                                                                                                                                                                                                                                                                       |
| Munitions and weapons                              | 2W | <p>Aircraft Armament Systems Craftsman/Journeyman;<br/> Aircraft Armament Systems Apprentice, F-15;<br/> Aircraft Armament Systems Helper/Apprentice, F-16;<br/> Aircraft Armament Systems Manager;<br/> Munitions Systems Apprentice/Journeyman/Craftsman;<br/> Nuclear Weapons Helper/Apprentice</p>                                                                                                                                                                                                                                                                                                                                                                                                                                                                                                                                                                                                                                                                                                                                                                                                                                                                                                                                                                                                                                                                                                                                                                                                                                                                                                                                                                                                                                                                                                                                                                                                                                                                                                                               |
| Communication-Electronics/Wire Systems Maintenance | 2E | <p>Automatic Tracking Radar;<br/> Communications Antenna Systems Apprentice;<br/> Communications Cable and Antenna Systems Journeyman;<br/> Communications Systems Superintendent;<br/> Ground Radar Systems Journeyman/Craftsman;<br/> Ground Radio Communications Helper/Apprentice/Craftsman;<br/> Instrumentation And Telemetry Systems Craftsman;<br/> Network Infrastructure Systems Journeyman/Craftsman;<br/> Satellite, Wideband and Telemetry Systems Journeyman/Craftsman;</p>                                                                                                                                                                                                                                                                                                                                                                                                                                                                                                                                                                                                                                                                                                                                                                                                                                                                                                                                                                                                                                                                                                                                                                                                                                                                                                                                                                                                                                                                                                                                            |

|                                       |       |                                                                                                                                                                                                                                                                                                                                                                                                                                                                                                                                                                                                                                                                                                                                                                                                                                                                                                                                                     |
|---------------------------------------|-------|-----------------------------------------------------------------------------------------------------------------------------------------------------------------------------------------------------------------------------------------------------------------------------------------------------------------------------------------------------------------------------------------------------------------------------------------------------------------------------------------------------------------------------------------------------------------------------------------------------------------------------------------------------------------------------------------------------------------------------------------------------------------------------------------------------------------------------------------------------------------------------------------------------------------------------------------------------|
|                                       |       | Secure Communications Systems Journeyman;<br>Space Systems Apprentice;<br>Visual Imagery and Intrusion Detection Systems Craftsman;<br>Voice Network Systems Apprentice/Journeyman/Craftsman                                                                                                                                                                                                                                                                                                                                                                                                                                                                                                                                                                                                                                                                                                                                                        |
| Communications/<br>network            | 3C    | Communications - Computer Systems Operations Apprentice/Journeyman/Craftsman;<br>Communications - Computer Systems Planning And Implementation Craftsman;<br>Communications - Computer Systems Programming Helper/Journeyman/Craftsman<br>Network Integration Journeyman/Craftsman;<br>Radio Communications Systems Craftsman                                                                                                                                                                                                                                                                                                                                                                                                                                                                                                                                                                                                                       |
| Cyberspace support                    | 3D    | Airfield Systems Craftsman;<br>Cable and Antenna Systems Journeyman/Craftsman;<br>Client Systems Apprentice/Journeyman/Craftsman;<br>Cyber Surety Journeyman/Craftsman;<br>Cyber Systems Operations Helper/Apprentice/Journeyman/Craftsman;<br>Cyber Transport Systems Journeyman/Craftsman;<br>RF Transmission Systems Journeyman/Craftsman                                                                                                                                                                                                                                                                                                                                                                                                                                                                                                                                                                                                        |
| Security forces                       | 3P    | Law Enforcement Apprentice;<br>Security Forces Helper/Apprentice/Journeyman/Craftsman;;<br>Security Forces Apprentice/Journeyman, Military Working Dog Handler;<br>Security Forces Journeyman, Combat Arms;<br>Security Forces Manager                                                                                                                                                                                                                                                                                                                                                                                                                                                                                                                                                                                                                                                                                                              |
| Fire protection                       | 3E7x1 | Fire Protection Apprentice/Journeyman/Craftsman;                                                                                                                                                                                                                                                                                                                                                                                                                                                                                                                                                                                                                                                                                                                                                                                                                                                                                                    |
| Aerospace<br>medical/surgical service | 4N    | Aerospace Medical Service Apprentice/Craftsman/Journeyman;<br>Aerospace Medical Service Craftsman, Independent Duty Medical Technician;<br>Aerospace Medical Service Journeyman, Allergy/immunology;<br>Surgical Service Journeyman/Craftsman                                                                                                                                                                                                                                                                                                                                                                                                                                                                                                                                                                                                                                                                                                       |
| Pilot                                 | 11    | Airlift Pilot, C-130;<br>Airlift Pilot, C-141;<br>Airlift Pilot, C-21<br>Bomber Pilot, B-52;<br>Fighter Pilot, A-10;<br>Fighter Pilot, Air Liaison Officer (ALO);<br>Fighter Pilot, F-15;<br>Fighter Pilot, F-15E;<br>Fighter Pilot, F-16;<br>Fighter Pilot, F-22;<br>Mobility Pilot, C-130E/H;<br>Mobility Pilot, C-130J;<br>Mobility Pilot, C-17;<br>Mobility Pilot, KC-10;<br>Mobility Pilot, KC-135;<br>Reconnaissance/Surveillance/Electronic Warfare Pilot, E-3;<br>Remotely Piloted Aircraft (RPA) Pilot, RQ-4;<br>Rescue Pilot, General;<br>Rescue Pilot, HH-60;<br>Special Operations Pilot, AC-130U;<br>Special Operations Pilot, Air Commando (NSAv, DM);<br>Special Operations Pilot, MC-130H;<br>Special Operations Pilot, U-28;<br>Tanker Pilot, KC-10;<br>Tanker Pilot, SUPT Phase III Instr (T-1/ T-38/T-44);<br>Trainer Pilot, AT-38;<br>Trainer Pilot, T-1;<br>Trainer Pilot, T-37;<br>Trainer Pilot, T-38;<br>Trainer Pilot, T-6 |

|                             |                              |                                                                                                                                                                                                                                                                                                                                                                                                                                                                                                                                                                                                                                                                                                                                  |
|-----------------------------|------------------------------|----------------------------------------------------------------------------------------------------------------------------------------------------------------------------------------------------------------------------------------------------------------------------------------------------------------------------------------------------------------------------------------------------------------------------------------------------------------------------------------------------------------------------------------------------------------------------------------------------------------------------------------------------------------------------------------------------------------------------------|
| Fixed-wing pilot            | 11A, 11K, 11M, 11R, 11S, 11T | <u>11A</u><br>Airlift Pilot, C-130;<br>Airlift Pilot, C-141;<br>Airlift Pilot, C-21<br><u>11K</u><br>Trainer Pilot, AT-38;<br>Trainer Pilot, T-1;<br>Trainer Pilot, T-37;<br>Trainer Pilot, T-38;<br>Trainer Pilot, T-6<br><u>11M</u><br>Mobility Pilot, C-130E/H;<br>Mobility Pilot, C-130J;<br>Mobility Pilot, C-17;<br>Mobility Pilot, KC-10;<br>Mobility Pilot, KC-135;<br><u>11R</u><br>Reconnaissance/Surveillance/Electronic Warfare Pilot, E-3;<br><u>11S</u><br>Special Operations Pilot, AC-130U;<br>Special Operations Pilot, Air Commando (NSAv, DM);<br>Special Operations Pilot, MC-130H;<br>Special Operations Pilot, U-28;<br>11T<br>Tanker Pilot, KC-10;<br>Tanker Pilot, SUPT Phase III Instr (T-1/ T-38/T-44) |
| Fighter pilot               | 11F                          | Fighter Pilot, A-10;<br>Fighter Pilot, Air Liaison Officer (ALO);<br>Fighter Pilot, F-15;<br>Fighter Pilot, F-15E;<br>Fighter Pilot, F-16;<br>Fighter Pilot, F-22                                                                                                                                                                                                                                                                                                                                                                                                                                                                                                                                                                |
| Pilot Trainee               | 92T0                         | Pilot Trainee                                                                                                                                                                                                                                                                                                                                                                                                                                                                                                                                                                                                                                                                                                                    |
| Pilot/pilot trainee         | 11, 92T0                     | All Pilots (AFSC 11) and pilot trainees combined                                                                                                                                                                                                                                                                                                                                                                                                                                                                                                                                                                                                                                                                                 |
| Space, nuclear, and missile | 13                           | Air Battle Manager, AWACS;<br>Air Battle Manager, Mobile Air Control;<br>Airfield Operations;<br>Combat Control;<br>Space and Missile Operations, Missile Combat Crew;<br>Space Operations;<br>Space Operations, Orbital Warfare;<br>Space Operations, Space Access and Sustainment;<br>Space Operations, Space Electronic Warfare                                                                                                                                                                                                                                                                                                                                                                                               |
| Civil engineer              | 3E, 32E                      | <u>3E</u><br>Electrical Power Production Apprentice/Journeyman/Craftsman;<br>Electrical Systems Apprentice/Craftsman;<br>Emergency Management Journeyman/Craftsman;<br>Engineering Journeyman/Craftsman;<br>Explosive Ordnance Disposal Apprentice/Journeyman/Craftsman/Superintendent;<br>Fire Protection Apprentice/Journeyman/Craftsman;<br>Heating, Ventilation, Air Conditioning, and Refrigeration<br>Apprentice/Journeyman/Craftsman;<br>Operations Management Journeyman;<br>Pavements and Construction Equipment Apprentice/Journeyman/Craftsman;<br>Pest Management Journeyman;<br>Structural Apprentice/Journeyman/Craftsman;                                                                                         |

|                                                    |             |                                                                                                                                                                                                                                                                                                                                                                                                                                                                                                                                                                                                                                                                                                                                                                                                                                                                                                                                                                                                                                                                                                                                                                                                                                                                                                                                                                                                                                                                                                                                                                                                                                                                                |
|----------------------------------------------------|-------------|--------------------------------------------------------------------------------------------------------------------------------------------------------------------------------------------------------------------------------------------------------------------------------------------------------------------------------------------------------------------------------------------------------------------------------------------------------------------------------------------------------------------------------------------------------------------------------------------------------------------------------------------------------------------------------------------------------------------------------------------------------------------------------------------------------------------------------------------------------------------------------------------------------------------------------------------------------------------------------------------------------------------------------------------------------------------------------------------------------------------------------------------------------------------------------------------------------------------------------------------------------------------------------------------------------------------------------------------------------------------------------------------------------------------------------------------------------------------------------------------------------------------------------------------------------------------------------------------------------------------------------------------------------------------------------|
|                                                    |             | Water and Fuel Systems Maintenance Apprentice/Journeyman/Craftsman<br><br><u>32E</u><br>Civil Engineer                                                                                                                                                                                                                                                                                                                                                                                                                                                                                                                                                                                                                                                                                                                                                                                                                                                                                                                                                                                                                                                                                                                                                                                                                                                                                                                                                                                                                                                                                                                                                                         |
| Intelligence                                       | 1N, 14N     | <u>1N</u><br>All Source Intelligence Analyst Apprentice/Journeyman/Craftsman;<br>Communication Signals Intelligence Journeyman/Craftsman;<br>Cryptologic Language Analyst Apprentice/Journeyman/Craftsman;<br>Cyber Intelligence Craftsman, Analyst;<br>Electronic Signals Intelligence Exploitation Craftsman;<br>Electronic Systems Security Assessment Craftsman;<br>Far East Cryptologic Linguist Apprentice, Korean;<br>Geospatial Intelligence Helper/Journeyman/Craftsman, Imagery Analyst;<br>Germanic Cryptologic Linguist Helper, German;<br>Imagery Analysis Helper/Journeyman/Craftsman;<br>Intelligence Analyst Apprentice/Craftsman, Cryptologic Analysis and Reporting;<br>Mid East Cryptologic Linguist Craftsman, Arabic;<br>Network Intelligence Analyst Journeyman/Craftsman;<br>Romance Cryptologic Linguist Journeyman, Spanish (Latin American);<br>Signals Intelligence Apprentice;<br>Signals Intelligence Journeyman, Communications Analyst;<br>Slavic Cryptologic Linguist Apprentice, Serbo-Croatian;<br>Slavic Cryptologic Linguist Craftsman, Russian<br><br><u>14N</u><br>Intelligence                                                                                                                                                                                                                                                                                                                                                                                                                                                                                                                                                          |
| <b>Occupational group based on job description</b> | <b>AFSC</b> |                                                                                                                                                                                                                                                                                                                                                                                                                                                                                                                                                                                                                                                                                                                                                                                                                                                                                                                                                                                                                                                                                                                                                                                                                                                                                                                                                                                                                                                                                                                                                                                                                                                                                |
| Aircraft maintenance                               | 2A, 21A     | <u>2A</u><br>Aerospace Maintenance Helper/Apprentice, C-18/C-135/E-3/VC-25/VC-137;<br>Aerospace Maintenance Journeyman;<br>Aerospace Maintenance Journeyman, All C-135/C-18/E-3/E-4/KC-10/ VC-25/VC-137;<br>Aerospace Maintenance Journeyman, B-1/B-2/B-52;<br>Aerospace Maintenance Journeyman, C-5/C-9/C-12/C-17/C-20/C-21/C-22/ C 26/C-27/C-130/T-39/T-43;<br>Aerospace Propulsion Apprentice, TF33, CF6, F103, F108, F117, TFE-731, TF39, PW 2040, F138 Jet Engines (Airlift, Special Mission, and B-52 aircraft);<br>Aerospace Propulsion Craftsman;<br>Aerospace Propulsion Craftsman/Journeyman, Turboprop and Turboshaft Propulsion;<br>Aerospace Propulsion Journeyman, F100, F101, F110, F118, F119, F135 Jet Engines;<br>Aerospace Propulsion Journeyman, Jet Engines;<br>Aircraft Fuel Systems Apprentice;<br>Aircraft Hydraulic Systems Journeyman/Craftsman;<br>Aircraft Structural Maintenance Apprentice/Journeyman/Craftsman;<br>Airlift/Special Mission Aircraft Maintenance Apprentice, C-17;<br>Airlift/Special Mission Aircraft Maintenance Craftsman/Superintendent;<br>Airlift/Special Mission Aircraft Maintenance Helper/Journeyman, C-130/C-27J;<br>Helicopter/Tiltrotor Aircraft Maintenance Journeyman/Craftsman;<br>Low Observable Aircraft Structural Maintenance Journeyman;<br>Refuel/Bomber Aircraft Maintenance Craftsman;<br>Refuel/Bomber Aircraft Maintenance Journeyman, Any C-135/E-3/E-8;<br>Remotely Piloted Aircraft Maintenance Journeyman, MQ-1/MQ-9;<br>Tactical Aircraft Maintenance Apprentice/Journeyman, F-15;<br>Tactical Aircraft Maintenance Craftsman;<br>Tactical Aircraft Maintenance Journeyman/Craftsman, F-16/F-117; |

|                 |                |                                                                                                                                                                                                                                                                                                                                                                                                                                                                                                                                                                                                                                                                                                                                                                                                                                                                                                                                                                                                                                                                                                                                                                                                                                                                                                                                                                                                                                                                                                         |
|-----------------|----------------|---------------------------------------------------------------------------------------------------------------------------------------------------------------------------------------------------------------------------------------------------------------------------------------------------------------------------------------------------------------------------------------------------------------------------------------------------------------------------------------------------------------------------------------------------------------------------------------------------------------------------------------------------------------------------------------------------------------------------------------------------------------------------------------------------------------------------------------------------------------------------------------------------------------------------------------------------------------------------------------------------------------------------------------------------------------------------------------------------------------------------------------------------------------------------------------------------------------------------------------------------------------------------------------------------------------------------------------------------------------------------------------------------------------------------------------------------------------------------------------------------------|
|                 |                | <p>Tactical Aircraft Maintenance Craftsman/Journeyman, General (except F-15/F-16);<br/> Tactical Aircraft Maintenance Helper, F-16;<br/> Tactical Aircraft Maintenance Journeyman, A-10/U-2;</p> <p><u>21A</u><br/> Aircraft Maintenance</p>                                                                                                                                                                                                                                                                                                                                                                                                                                                                                                                                                                                                                                                                                                                                                                                                                                                                                                                                                                                                                                                                                                                                                                                                                                                            |
| Aircraft crew   | 12, 13, 1A, 2A | <p><u>12</u><br/> Airlift Navigator, C-130;<br/> Airlift Navigator, SUNT Instructor;<br/> Bomber Combat Systems Officer, General;<br/> Bomber Navigator, B-1 Defensive Systems Officer (EWO);<br/> Bomber Combat Systems Officer, B-52 WSO;<br/> Bomber Combat Systems Officer, B-52 EWO;<br/> Mobility Combat Systems Officer, KC-135;<br/> Reconnaissance/Surveillance/Electronic Warfare Combat Systems Officer, RC-135;<br/> Reconnaissance/Surveillance/Electronic Warfare Combat Systems Officer, EC-130 EWO;<br/> Special Operations Combat Systems Officer, U-28;<br/> Special Operations Combat Systems Officer, AC-130H EWO;<br/> Trainer Combat Systems Officer, SUNT, WSO;</p> <p><u>13</u><br/> Air Battle Manager, AWACS;<br/> Air Battle Manager, Mobile Air Control;</p> <p><u>1A</u><br/> Airborne Battle Management Systems Craftsman, Weapons Director;<br/> Airborne Cryptologic Linguist Craftsman;<br/> Airborne Cryptologic Language Analyst Helper;<br/> Airborne Missions Systems Journeyman;<br/> Airborne Mission Systems Specialist Journeyman/Craftsman/Superintendent;<br/> Airborne Operations Journeyman;<br/> Aircraft Loadmaster Apprentice/Journeyman/Craftsman;<br/> Flight Engineer Craftsman;<br/> In-Flight Refueling Specialist Helper/Apprentice/Craftsman;<br/> Special Mission Aviator Craftsman;</p> <p><u>2A</u><br/> Airborne Surveillance Radar Systems Craftsman;<br/> Aircraft Metals Technology Craftsman;<br/> Aircrew Egress Systems Journeyman</p> |
| Ammunition      | 3E, 2W         | <p><u>3E</u><br/> Explosive Ordnance Disposal Apprentice/Journeyman/Craftsman/Superintendent;</p> <p><u>2W</u><br/> Aircraft Armament Systems Apprentice, F-15;<br/> Aircraft Armament Systems Apprentice, F-16;<br/> Aircraft Armament Systems Journeyman/Craftsman/Manager;<br/> Munitions Systems Apprentice/Journeyman/Craftsman;</p>                                                                                                                                                                                                                                                                                                                                                                                                                                                                                                                                                                                                                                                                                                                                                                                                                                                                                                                                                                                                                                                                                                                                                               |
| Fuels/petroleum | 2A, 2F, 63     | <p><u>2A</u><br/> Aircraft Fuel Systems Journeyman/Craftsman;</p> <p><u>2F</u><br/> Fuels Apprentice/Journeyman/Craftsman;</p> <p><u>63</u><br/> Fuel Manager</p>                                                                                                                                                                                                                                                                                                                                                                                                                                                                                                                                                                                                                                                                                                                                                                                                                                                                                                                                                                                                                                                                                                                                                                                                                                                                                                                                       |

|                            |                        |                                                                                                                                                                                                                                                                                                                                                                                                                                                                                                                                                                                                                                                                                                                                                                                                                                                                                                                                                                                                                                                                                                                                                                                                                                                                                                                                                                                                                                                                                                                                                                                                                                                                                                                                                                                                                                                                                  |
|----------------------------|------------------------|----------------------------------------------------------------------------------------------------------------------------------------------------------------------------------------------------------------------------------------------------------------------------------------------------------------------------------------------------------------------------------------------------------------------------------------------------------------------------------------------------------------------------------------------------------------------------------------------------------------------------------------------------------------------------------------------------------------------------------------------------------------------------------------------------------------------------------------------------------------------------------------------------------------------------------------------------------------------------------------------------------------------------------------------------------------------------------------------------------------------------------------------------------------------------------------------------------------------------------------------------------------------------------------------------------------------------------------------------------------------------------------------------------------------------------------------------------------------------------------------------------------------------------------------------------------------------------------------------------------------------------------------------------------------------------------------------------------------------------------------------------------------------------------------------------------------------------------------------------------------------------|
| Electrical/electronics     | 2A, 2E, 2P, 3D, 3E     | <p><u>2A</u><br/>A-10, F-15, and U-2 Avionics Systems Apprentice/Journeyman, Attack Control; A-10, F-15, and U-2 Avionics Systems Journeyman, Communication, Navigation, And Penetration Aids;<br/>Aircraft Electrical And Environmental Systems Journeyman/Craftsman;<br/>Avionics Test Station And Components Apprentice, Avionics Sensor Systems, All Helicopters and Aircraft;<br/>Avionics Test Station And Components Craftsman, Avionics Systems, All Helicopters and Aircraft (Except F-15);<br/>Avionics Test Station And Components Craftsman, Avionics Systems, F-15;<br/>Avionics Test Station And Components Craftsman, Electronic Warfare Systems, All Helicopters and Aircraft;<br/>Avionics Test Station And Components Journeyman, Avionics Systems Bomber/Special Electronic Warfare and Radar Surveillance Integrated Avionics Craftsman;<br/>Electronic Warfare Systems;<br/>Integrated Avionics Systems (Attack/Special) Journeyman;<br/>Integrated Avionics Systems (Heavy) Journeyman/Craftsman, Communication, Navigation, and Mission;<br/>Integrated Avionics Systems (Heavy) Journeyman/Craftsman, Instrument And Flight Controls;<br/>Mobility Air Forces Integrated Communication/Navigation/Mission Systems Craftsman, Cargo Comm/Counter/Nav Systems;<br/>Mobility Air Forces Integrated Communication/Navigation/Mission Systems Craftsman, Tanker Comm/Counter/Nav Systems;</p> <p><u>2E</u><br/>Communications Antenna Systems Apprentice;<br/>Communications Cable and Antenna Systems Journeyman;<br/>Secure Communications Systems Journeyman;</p> <p><u>2P</u><br/>Precision Measurement Equipment Laboratory Journeyman/Craftsman;</p> <p><u>3D</u><br/>Cable and Antenna Systems Journeyman/Craftsman;</p> <p><u>3E</u><br/>Electrical Power Production Apprentice/Journeyman/Craftsman;<br/>Electrical Systems Apprentice/Craftsman</p> |
| Mechanic/Other maintenance | 2A, 2E, 2M, 2T, 3E, 4A | <p><u>2A</u><br/>Aerospace Ground Equipment Apprentice Journeyman/Craftsman/Superintendent;<br/>Avionic Sensors Maintenance Apprentice;<br/>Nondestructive Inspection Journeyman;</p> <p><u>2E</u><br/>Instrumentation And Telemetry Systems Craftsman</p> <p><u>2M</u><br/>Missile And Space Systems Electronic Maintenance Helper, ICBM;<br/>Missile And Space Systems Electronic Maintenance Journeyman;<br/>Missile And Space Systems Maintenance Journeyman/Craftsman;</p> <p><u>2T</u><br/>Mission Generation Vehicular Equipment Maintenance Apprentice/Journeyman;<br/>Vehicle And Vehicular Equipment Maintenance Craftsman;</p>                                                                                                                                                                                                                                                                                                                                                                                                                                                                                                                                                                                                                                                                                                                                                                                                                                                                                                                                                                                                                                                                                                                                                                                                                                        |

|                             |                                                          |                                                                                                                                                                                                                                                                                                                                                                                                                                                                                                                                                                                                                                                                                                                                                                                                                                                                                                                          |
|-----------------------------|----------------------------------------------------------|--------------------------------------------------------------------------------------------------------------------------------------------------------------------------------------------------------------------------------------------------------------------------------------------------------------------------------------------------------------------------------------------------------------------------------------------------------------------------------------------------------------------------------------------------------------------------------------------------------------------------------------------------------------------------------------------------------------------------------------------------------------------------------------------------------------------------------------------------------------------------------------------------------------------------|
|                             |                                                          | <p>Vehicle Body Maintenance Journeyman;</p> <p><u>3E</u><br/>Heating, Ventilation, Air Conditioning, and Refrigeration<br/>Apprentice/Journeyman/Craftsman;<br/>Water and Fuel Systems Maintenance Apprentice/Journeyman/Craftsman;</p> <p><u>4A</u><br/>Biomedical Equipment Craftsman</p>                                                                                                                                                                                                                                                                                                                                                                                                                                                                                                                                                                                                                              |
| Law enforcement/Security    | 3P, 31P, 81                                              | <p><u>3P</u><br/>Law Enforcement Apprentice;<br/>Law Enforcement Specialist;<br/>Security Forces Helper/Apprentice/Journeyman/Craftsman/Manager;<br/>Security Forces Apprentice/Journeyman, Military Working Dog Handler;<br/>Security Forces Journeyman, Combat Arms;</p> <p><u>31P</u><br/>Security Forces;</p> <p><u>81</u><br/>Security Specialist</p>                                                                                                                                                                                                                                                                                                                                                                                                                                                                                                                                                               |
| Radio/Communications /Radar | 1C, 2A, 2E, 3C, 3D, 33S                                  | <p><u>1C</u><br/>Command and Control Battle Management Operations<br/>Apprentice/Journeyman/Craftsman;<br/>Command and Control Battle Management Operations Craftsman, Weapons Director;<br/>Space Systems Operations Journeyman;</p> <p><u>2A</u><br/>A-10, F-15, and U-2 Avionics Systems Helper, Communication, Navigation, And<br/>Penetration Aids;<br/>Communication And Navigation Systems Craftsman;</p> <p><u>2E</u><br/>Communications Systems Superintendent;<br/>Ground Radar Systems Craftsman;<br/>Ground Radio Communications Helper/Apprentice/Craftsman;<br/>Satellite, Wideband and Telemetry Systems Journeyman/Craftsman;</p> <p><u>3C</u><br/>Network Integration Journeyman/Craftsman;<br/>Radio Communications Systems Craftsman;</p> <p><u>3D</u><br/>Ground Radar Systems Craftsman;<br/>RF Transmission Systems Journeyman/Craftsman;</p> <p><u>33S</u><br/>Communications and Information</p> |
| Medical                     | 42, 44, 45, 46, 47, 48, 4C, 4D, 4F, 4N, 4P, 4R, 4Y, 92M1 | <p><u>42</u><br/>Clinical Social Worker;<br/>Physician Assistant;</p> <p><u>44</u><br/>Allergist;<br/>Chief, Hospital/Clinic Services;<br/>Diagnostic Radiologist;</p>                                                                                                                                                                                                                                                                                                                                                                                                                                                                                                                                                                                                                                                                                                                                                   |



|                        |                                              |                                                                                                                                                                                                                                                                                                                                                                                                                                                                                                                                                                                                                                                                                                                                                                                                                                                                                                                                                                                                                                                                                                                                                                                                                                                                                                                                                                                                                                                                |
|------------------------|----------------------------------------------|----------------------------------------------------------------------------------------------------------------------------------------------------------------------------------------------------------------------------------------------------------------------------------------------------------------------------------------------------------------------------------------------------------------------------------------------------------------------------------------------------------------------------------------------------------------------------------------------------------------------------------------------------------------------------------------------------------------------------------------------------------------------------------------------------------------------------------------------------------------------------------------------------------------------------------------------------------------------------------------------------------------------------------------------------------------------------------------------------------------------------------------------------------------------------------------------------------------------------------------------------------------------------------------------------------------------------------------------------------------------------------------------------------------------------------------------------------------|
|                        |                                              | <p>Emergency Services Physician, Emergency Medicine Specialist;<br/> Family Physician;<br/> General Practice Physician;<br/> Internist;</p> <p><u>45</u><br/> Otorhinolaryngologist;</p> <p><u>46</u><br/> Clinical Nurse;<br/> Clinical Nurse, Critical Care;<br/> Clinical Nurse, Neonatal Intensive Care;</p> <p><u>47</u><br/> Dentist;<br/> Dentist, General Clinical;<br/> Oral and Maxillofacial Surgeon;<br/> Oral and Maxillofacial Surgeon, Facial Esthetics;<br/> Periodontist;</p> <p><u>48</u><br/> General Medicine Officer (GMO) Flight Surgeon;</p> <p><u>4C</u><br/> Mental Health Service Journeyman;</p> <p><u>4D</u><br/> Diet Therapy Journeyman;</p> <p><u>4F</u><br/> Aeromedical Journeyman/Craftsman;</p> <p><u>4N</u><br/> Aerospace Medical Service Apprentice/Journeyman/Craftsman;<br/> Aerospace Medical Service Craftsman, Independent Duty Medical Technician;<br/> Aerospace Medical Service Journeyman, Allergy/immunology;<br/> Surgical Service Journeyman/Craftsman;</p> <p><u>4P</u><br/> Pharmacy Craftsman;</p> <p><u>4R</u><br/> Diagnostic Imaging Craftsman;<br/> Diagnostic Imaging Craftsman, Diagnostic Medical Sonography;<br/> Diagnostic Imaging Craftsman, Magnetic Resonance Imaging;<br/> Diagnostic Imaging Journeyman;</p> <p><u>4Y</u><br/> Dental Assistant Apprentice;<br/> Dental Laboratory Craftsman;</p> <p><u>92M1</u><br/> Uniformed Services University of Health Sciences (USUHS) Student</p> |
| Administrative/Support | 13,16,17,18,20,<br>21,27,<br>43,51,60,62,63, | <p><u>13</u><br/> Airfield Operations;<br/> Combat Control;</p>                                                                                                                                                                                                                                                                                                                                                                                                                                                                                                                                                                                                                                                                                                                                                                                                                                                                                                                                                                                                                                                                                                                                                                                                                                                                                                                                                                                                |

|  |                                                                                                                                                                                  |                                                                                                                                                                                                                                                                                                                                                                                                                                                                                                                                                                                                                                                                                                                                                                                                                                                                                                                                                                                                                                                                                                                                                                                                                                                                  |
|--|----------------------------------------------------------------------------------------------------------------------------------------------------------------------------------|------------------------------------------------------------------------------------------------------------------------------------------------------------------------------------------------------------------------------------------------------------------------------------------------------------------------------------------------------------------------------------------------------------------------------------------------------------------------------------------------------------------------------------------------------------------------------------------------------------------------------------------------------------------------------------------------------------------------------------------------------------------------------------------------------------------------------------------------------------------------------------------------------------------------------------------------------------------------------------------------------------------------------------------------------------------------------------------------------------------------------------------------------------------------------------------------------------------------------------------------------------------|
|  | <p>64, 65, 97, 10C, 14N, 1C, 1N, 1W, 21R, 2E, 2G, 2R, 2S, 2T, 32E, 33S, 34M, 36M, 36P, 38F, 38P, 3A, 3C, 3D, 3M, 3N, 3S, 3V, 41A, 4A, 4E, 52R, 5R, 6C, 6F, 7S, 8R, 8M000, 9E</p> | <p>Space and Missile Operations, Missile Combat Crew; Space Operations; Space Operations, Orbital Warfare; Space Operations, Space Access and Sustainment; Space Operations, Space Electronic Warfare;</p> <p><u>16</u><br/>Air Force Operations Staff Officer; Foreign Area Officer (FAO), Attache;</p> <p><u>17</u><br/>Warfighter Communications Operations, Expeditionary Communications Operations; Warfighter Communications Operations, Network Operations;</p> <p><u>18</u><br/>Attack Remotely Piloted Aircraft Pilot, MQ-1;</p> <p><u>20</u><br/>Signal Intelligence Analysis Specialist;</p> <p><u>21</u><br/>Supply;</p> <p><u>27</u><br/>Tactical Air Command &amp; Control Specialist;</p> <p><u>43</u><br/>Bioenvironmental Engineer, General; Bioenvironmental Engineer, Health Physics;</p> <p><u>51</u><br/>Judge Advocate;</p> <p><u>60</u><br/>Air Transportation Manager;</p> <p><u>62</u><br/>Developmental Engineer, Aeronautical; Developmental Engineer, Computer Systems; Developmental Engineer, Electrical/Electronic;</p> <p><u>63</u><br/>Acquisition Manager;</p> <p><u>64</u><br/>Contracting;</p> <p><u>65</u><br/>Financial Management;</p> <p><u>97</u><br/>Executive Officer</p> <p><u>10C</u><br/>Operations Commander;</p> |
|--|----------------------------------------------------------------------------------------------------------------------------------------------------------------------------------|------------------------------------------------------------------------------------------------------------------------------------------------------------------------------------------------------------------------------------------------------------------------------------------------------------------------------------------------------------------------------------------------------------------------------------------------------------------------------------------------------------------------------------------------------------------------------------------------------------------------------------------------------------------------------------------------------------------------------------------------------------------------------------------------------------------------------------------------------------------------------------------------------------------------------------------------------------------------------------------------------------------------------------------------------------------------------------------------------------------------------------------------------------------------------------------------------------------------------------------------------------------|

|  |                                                                                                                                                                                                                                                                                                                                                                                                                                                                                                                                                                                                                                                                                                                                                                                                                                                                                                                                                                                                                                                                                                                                                                                                                                                                                                                                                                                                                                                                                                                                                                                                                                                                                                                                                                                                                                                                                                                                                                                                                                                                                               |
|--|-----------------------------------------------------------------------------------------------------------------------------------------------------------------------------------------------------------------------------------------------------------------------------------------------------------------------------------------------------------------------------------------------------------------------------------------------------------------------------------------------------------------------------------------------------------------------------------------------------------------------------------------------------------------------------------------------------------------------------------------------------------------------------------------------------------------------------------------------------------------------------------------------------------------------------------------------------------------------------------------------------------------------------------------------------------------------------------------------------------------------------------------------------------------------------------------------------------------------------------------------------------------------------------------------------------------------------------------------------------------------------------------------------------------------------------------------------------------------------------------------------------------------------------------------------------------------------------------------------------------------------------------------------------------------------------------------------------------------------------------------------------------------------------------------------------------------------------------------------------------------------------------------------------------------------------------------------------------------------------------------------------------------------------------------------------------------------------------------|
|  | <p><u>14N</u><br/>Intelligence;</p> <p><u>1C</u><br/>Air Traffic Control Helper/Apprentice/Journeyman/Craftsman/Manager;<br/>Combat Control Journeyman/Craftsman/Superintendent;<br/>Command and Control Operations Craftsman;</p> <p><u>1N</u><br/>All Source Intelligence Analyst Apprentice/Journeyman/Craftsman;<br/>Communication Signals Intelligence Journeyman/Craftsman;<br/>Cryptologic Language Analyst Apprentice/Journeyman/Craftsman;<br/>Cyber Intelligence Craftsman, Analyst;<br/>Electronic Signals Intelligence Exploitation Craftsman;<br/>Electronic Systems Security Assessment Craftsman;<br/>Far East Cryptologic Linguist Apprentice, Korean;<br/>Geospatial Intelligence Helper/Journeyman/Craftsman, Imagery Analyst;<br/>Germanic Cryptologic Linguist Helper, German;<br/>Imagery Analysis Helper/Journeyman/Craftsman;<br/>Intelligence Analyst Apprentice/Craftsman, Cryptologic Analysis and Reporting;<br/>Mid East Cryptologic Linguist Craftsman, Arabic;<br/>Network Intelligence Analyst Journeyman/Craftsman;<br/>Romance Cryptologic Linguist Journeyman, Spanish (Latin American);<br/>Signals Intelligence Apprentice;<br/>Signals Intelligence Journeyman, Communications Analyst;<br/>Slavic Cryptologic Linguist Apprentice, Serbo-Croatian;<br/>Slavic Cryptologic Linguist Craftsman, Russian;</p> <p><u>1W</u><br/>Weather Journeyman/Craftsman;<br/>Weather Craftsman, Forecaster;</p> <p><u>21R</u><br/>Logistics Readiness;</p> <p><u>2E</u><br/>Communications Systems Superintendent;<br/>Ground Radar Systems Journeyman;<br/>Network Infrastructure Systems Journeyman/Craftsman;<br/>Visual Imagery and Intrusion Detection Systems Craftsman;<br/>Voice Network Systems Apprentice/Journeyman/Craftsman;</p> <p><u>2G</u><br/>Logistics Plans Craftsman;</p> <p><u>2R</u><br/>Maintenance Management Production Journeyman/Craftsman;</p> <p><u>2S</u><br/>Materiel Management Apprentice/Journeyman/Craftsman;<br/>Supply Systems Analysis Apprentice;</p> <p><u>2T</u><br/>Air Transportation Superintendent;</p> <p><u>32E</u></p> |
|--|-----------------------------------------------------------------------------------------------------------------------------------------------------------------------------------------------------------------------------------------------------------------------------------------------------------------------------------------------------------------------------------------------------------------------------------------------------------------------------------------------------------------------------------------------------------------------------------------------------------------------------------------------------------------------------------------------------------------------------------------------------------------------------------------------------------------------------------------------------------------------------------------------------------------------------------------------------------------------------------------------------------------------------------------------------------------------------------------------------------------------------------------------------------------------------------------------------------------------------------------------------------------------------------------------------------------------------------------------------------------------------------------------------------------------------------------------------------------------------------------------------------------------------------------------------------------------------------------------------------------------------------------------------------------------------------------------------------------------------------------------------------------------------------------------------------------------------------------------------------------------------------------------------------------------------------------------------------------------------------------------------------------------------------------------------------------------------------------------|

|  |                                                                                                                                                                                                                                                                                                                                                                                                                                                                                                                                                                                                                                                                                                                                                                                                                                                                                                                                                                                                                                                                                                                                                                                                                                                                                                                                                                                                  |
|--|--------------------------------------------------------------------------------------------------------------------------------------------------------------------------------------------------------------------------------------------------------------------------------------------------------------------------------------------------------------------------------------------------------------------------------------------------------------------------------------------------------------------------------------------------------------------------------------------------------------------------------------------------------------------------------------------------------------------------------------------------------------------------------------------------------------------------------------------------------------------------------------------------------------------------------------------------------------------------------------------------------------------------------------------------------------------------------------------------------------------------------------------------------------------------------------------------------------------------------------------------------------------------------------------------------------------------------------------------------------------------------------------------|
|  | <p>Civil Engineer;</p> <p><u>33S</u><br/>Communications and Information;</p> <p><u>34M</u><br/>Services;</p> <p><u>36M</u><br/>Mission Support;</p> <p><u>36P</u><br/>Personnel;</p> <p><u>38F</u><br/>Force Support;</p> <p><u>38P</u><br/>Personnel;<br/>Personnel, Analyst;</p> <p><u>3A</u><br/>Administration Journeyman/Craftsman;<br/>Knowledge Operations Management Journeyman/Craftsman/Superintendent;</p> <p><u>3C</u><br/>Communications - Computer Systems Operations Apprentice/Journeyman/Craftsman;<br/>Communications - Computer Systems Planning And Implementation Craftsman;<br/>Communications - Computer Systems Programming Helper/Journeyman/Craftsman;</p> <p><u>3D</u><br/>Airfield Systems Craftsman;<br/>Client Systems Apprentice/Craftsman;<br/>Cyber Surety Journeyman/Craftsman;<br/>Cyber Systems Operations Helper/Journeyman;<br/>Cyber Transport Systems Journeyman/Craftsman;</p> <p><u>3M</u><br/>Services Apprentice/Journeyman/Craftsman;</p> <p><u>3N</u><br/>Broadcast Journalist Apprentice;<br/>Graphic Arts Craftsman;<br/>Photojournalist Journeyman;<br/>Premier Band - The USAF Band Craftsman;<br/>Regional Band Craftsman, Trombone;</p> <p><u>3S</u><br/>Education And Training Craftsman/Superintendent;<br/>Personnel Journeyman/Craftsman;</p> <p><u>3V</u><br/>Video Craftsman;</p> <p><u>41A</u><br/>Health Services Administrator;</p> |
|--|--------------------------------------------------------------------------------------------------------------------------------------------------------------------------------------------------------------------------------------------------------------------------------------------------------------------------------------------------------------------------------------------------------------------------------------------------------------------------------------------------------------------------------------------------------------------------------------------------------------------------------------------------------------------------------------------------------------------------------------------------------------------------------------------------------------------------------------------------------------------------------------------------------------------------------------------------------------------------------------------------------------------------------------------------------------------------------------------------------------------------------------------------------------------------------------------------------------------------------------------------------------------------------------------------------------------------------------------------------------------------------------------------|

|                                 |                                                                                                 |                                                                                                                                                                                                                                                                                                                                                                                                                                                                                                                                                                                                                                                                                  |
|---------------------------------|-------------------------------------------------------------------------------------------------|----------------------------------------------------------------------------------------------------------------------------------------------------------------------------------------------------------------------------------------------------------------------------------------------------------------------------------------------------------------------------------------------------------------------------------------------------------------------------------------------------------------------------------------------------------------------------------------------------------------------------------------------------------------------------------|
|                                 |                                                                                                 | <p><u>4A</u><br/>Health Services Management Helper/Journeyman/Craftsman;<br/>Medical Materiel Journeyman/Craftsman;</p> <p><u>4E</u><br/>Public Health Craftsman;</p> <p><u>52R</u><br/>Chaplain, Roman Catholic;</p> <p><u>5R</u><br/>Religious Affairs Craftsman;</p> <p><u>6C</u><br/>Contracting Journeyman/Craftsman;</p> <p><u>6F</u><br/>Financial Management and Comptroller Journeyman/Craftsman/Superintendent;</p> <p><u>7S</u><br/>Special Investigations Craftsman;</p> <p><u>8R</u><br/>Enlisted Accessions Recruiter;<br/>Second Tier Recruiter;<br/>Third Tier Recruiter;</p> <p><u>8M000</u><br/>Postal;</p> <p><u>9E</u><br/>Command Chief Master Sergeant</p> |
| Miscellaneous/Other/<br>Unknown | 45, 61, 62,<br>15W, 1C, 1P,<br>1S, 1T, 1U, 2A,<br>2E, 2T, 2W, 3E,<br>4B, 8F, 9S,<br>90G0, 9T000 | <p><u>45</u><br/>Aerospace Propulsion Specialist;</p> <p><u>61</u><br/>Operations Research Analyst;<br/>Physicist/Nuclear Engineer;<br/>Scientist, Physics/Nuclear Engineering;</p> <p><u>62</u><br/>Developmental Engineer, Mechanical;</p> <p><u>15W</u><br/>Weather and Environmental Sciences;<br/>Weather, Special Operations Weather;</p> <p><u>1C</u><br/>Combat Control Helper/Journeyman;<br/>Tactical Air Control Party (TACP) Apprentice/Journeyman/Craftsman;</p> <p><u>1P</u><br/>Aircrew Flight Equipment Apprentice/Journeyman;</p> <p><u>1S</u></p>                                                                                                              |

|  |                                                                                                                                                                                                                                                                                                                                                                                                                                                                                                                                                                                                                                                                                                                                                                                                                                                                                                                                                                                                                                                                                                                                                                                                                                                                                                                                                                                                                                                                                                                                                                                                                                                                                                                                                                                                                                                                                                                              |
|--|------------------------------------------------------------------------------------------------------------------------------------------------------------------------------------------------------------------------------------------------------------------------------------------------------------------------------------------------------------------------------------------------------------------------------------------------------------------------------------------------------------------------------------------------------------------------------------------------------------------------------------------------------------------------------------------------------------------------------------------------------------------------------------------------------------------------------------------------------------------------------------------------------------------------------------------------------------------------------------------------------------------------------------------------------------------------------------------------------------------------------------------------------------------------------------------------------------------------------------------------------------------------------------------------------------------------------------------------------------------------------------------------------------------------------------------------------------------------------------------------------------------------------------------------------------------------------------------------------------------------------------------------------------------------------------------------------------------------------------------------------------------------------------------------------------------------------------------------------------------------------------------------------------------------------|
|  | <p>Safety Craftsman;</p> <p><u>1T</u><br/>Aircrew Life Support Journeyman;<br/>Survival, Evasion, Resistance, Escape (SERE) Specialist Apprentice;</p> <p><u>1U</u><br/>Sensor Operator Craftsman;</p> <p><u>2A</u><br/>A-10, F-15, and U-2 Avionics Systems Helper, Attack Control;<br/>Aerospace Ground Equipment Helper;<br/>Aircraft Electrical And Environmental Systems Helper;<br/>Aircraft Fabrication Superintendent;<br/>Aircraft Guidance And Control Systems Apprentice/Craftsman;<br/>Aircraft Hydraulic Systems Craftsman;<br/>Aircrew Egress Systems Apprentice/Craftsman;<br/>Avionics Guidance And Control Systems Craftsman;<br/>Avionics Test Station And Components Helper, Avionics Sensor Systems and Electronic Warfare Systems;<br/>Avionics Test Station And Components Helper, Avionics Systems;<br/>Avionics Test Station And Components Helper, Avionics Systems, F-15;<br/>Bomb-navigation Systems;<br/>Electronic Warfare Systems Journeyman;<br/>Integrated Avionics Systems (Heavy) Apprentice, Instrument And Flight Controls;<br/>Integrated Avionics Systems (Heavy) Helper, Instrument And Flight Controls;<br/>Nondestructive Inspection Craftsman;<br/>Survival Equipment Journeyman;</p> <p><u>2E</u><br/>Automatic Tracking Radar;</p> <p><u>2T</u><br/>Air Transportation Helper/Apprentice/Journeyman/Craftsman;<br/>Ground Transportation Apprentice/Journeyman/Craftsman;<br/>Traffic Management Journeyman/Craftsman;</p> <p><u>2W</u><br/>Aircraft Armament Systems Helper, F-16;<br/>Nuclear Weapons Helper/Apprentice;</p> <p><u>3E</u><br/>Emergency Management Journeyman/Craftsman;<br/>Engineering Journeyman/Craftsman;<br/>Operations Management Journeyman;<br/>Pest Management Journeyman;</p> <p><u>4B</u><br/>Bioenvironmental Engineering Apprentice/Craftsman;</p> <p><u>8F</u><br/>First Sergeant;</p> <p><u>9S</u><br/>Scientific Applications Specialist;</p> |
|--|------------------------------------------------------------------------------------------------------------------------------------------------------------------------------------------------------------------------------------------------------------------------------------------------------------------------------------------------------------------------------------------------------------------------------------------------------------------------------------------------------------------------------------------------------------------------------------------------------------------------------------------------------------------------------------------------------------------------------------------------------------------------------------------------------------------------------------------------------------------------------------------------------------------------------------------------------------------------------------------------------------------------------------------------------------------------------------------------------------------------------------------------------------------------------------------------------------------------------------------------------------------------------------------------------------------------------------------------------------------------------------------------------------------------------------------------------------------------------------------------------------------------------------------------------------------------------------------------------------------------------------------------------------------------------------------------------------------------------------------------------------------------------------------------------------------------------------------------------------------------------------------------------------------------------|

---

|  |                                       |
|--|---------------------------------------|
|  | <u>90G0</u><br>General Officer;       |
|  | <u>9T000</u><br>Basic Enlisted Airman |

---

**Supplemental Table 2. Case-control associations between pilot occupation and TGCT using different reference groups**

| Occupation (AFSC)                                                           | Cases   | Controls | OR (95% CI)             |
|-----------------------------------------------------------------------------|---------|----------|-------------------------|
|                                                                             | (N=530) | (N=530)  |                         |
|                                                                             | N       | N        |                         |
| <b>Pilot (11) at serum sample and at case diagnosis</b>                     |         |          |                         |
| All enlisted (non-pilots)                                                   | 410     | 435      | Reference               |
| Non-pilot officer                                                           | 99      | 87       | 1.20 (0.82-1.76)        |
| Pilot officer                                                               | 21      | 8        | <b>2.90 (1.22-6.89)</b> |
| <b>Pilot (11) at serum sample and at case diagnosis</b>                     |         |          |                         |
| All enlisted (non-pilots)                                                   | 410     | 435      | 0.94 (0.57-1.23)        |
| Non-pilot officer                                                           | 99      | 87       | Reference               |
| Pilot officer                                                               | 21      | 8        | 2.43 (0.96-6.13)        |
| <b>Pilot/pilot trainee (11, 92T0) at serum sample and at case diagnosis</b> |         |          |                         |
| All enlisted (non-pilots)                                                   | 410     | 435      | Reference               |
| Non-pilot officer                                                           | 79      | 70       | 1.20 (0.81-1.79)        |
| Pilot officer                                                               | 41      | 25       | <b>1.96 (1.10-3.48)</b> |
| <b>Pilot/pilot trainee (11, 92T0) at serum sample and at case diagnosis</b> |         |          |                         |
| All enlisted (non-pilots)                                                   | 410     | 435      | 0.83 (0.56-1.24)        |
| Non-pilot officer                                                           | 79      | 70       | Reference               |
| Pilot officer                                                               | 41      | 25       | 1.63 (0.86-3.07)        |

All conditional logistic regression models adjusted for number of deployments before case diagnosis (0, 1, 2+)

Abbreviations: AFSC = Air Force Specialty Code; OR = Odds Ratio; CI = Confidence Interval; TGCT = Testicular germ cell tumors

Bold indicative of statistical significance



**Supplemental Table 3. Case-control associations between occupation at case diagnosis and TGCT excluding 202 airmen with <3 years of service**

| Occupation (AFSC)                                                 | Cases   | Controls | OR (95% CI)             |
|-------------------------------------------------------------------|---------|----------|-------------------------|
|                                                                   | (N=428) | (N=430)  |                         |
|                                                                   | N       | N        |                         |
| Aircrew operations (1A)                                           | 13      | 20       | 0.73 (0.35-1.52)        |
| Command and control systems operations (1C)                       | 16      | 9        | 1.83 (0.80-4.15)        |
| Aerospace maintenance (2A)                                        | 76      | 76       | 1.01(0.71-1.44)         |
| Fuels (2F)                                                        | 11      | 6        | 1.98 (0.72-5.40)        |
| Material management (2S)                                          | 9       | 8        | 1.17 (0.45-3.05)        |
| Transportation (2T)                                               | 17      | 18       | 1.03 (0.52-2.06)        |
| Munitions and weapons (2W)                                        | 20      | 22       | 0.90 (0.48-1.68)        |
| Communication-Electronics/Wire Systems Maintenance (2E)           | 9       | 20       | 0.46 (0.21-1.01)        |
| Communications/network (3C)                                       | 10      | 7        | 1.44 (0.51-4.05)        |
| Cyberspace support (3D)                                           | 17      | 16       | 1.09(0.52-2.27)         |
| Security forces (3P)                                              | 26      | 31       | 0.91 (0.52-1.61)        |
| Fire protection (3E7X1)                                           | 9       | 5        | 1.73 (0.57-5.18)        |
| Aerospace medical/surgical service (4N)                           | 7       | 15       | 0.46 (0.19-1.14)        |
| Pilot (11)                                                        | 36      | 22       | <b>1.80 (1.02-3.18)</b> |
| Fixed-wing pilot (11A, 11K, 11M, 11R, 11S, 11T)                   | 20      | 16       | 1.29 (0.65-2.56)        |
| Fighter pilot (11F)                                               | 13      | 5        | 2.72 (0.96-7.70)        |
| Pilot Trainee (92T0)                                              | 4       | 2        | -                       |
| Pilot/pilot trainee (11, 92T0)                                    | 40      | 24       | <b>1.76 (1.01-3.05)</b> |
| Space, nuclear, and missile (13)                                  | 10      | 12       | 0.89 (0.38-2.06)        |
| Civil engineer (3E, 32E) <sup>1</sup>                             | 28      | 33       | 0.86 (0.50-1.45)        |
| Intelligence (1N, 14N) <sup>1</sup>                               | 16      | 20       | 0.78 (0.39-1.54)        |
| <b>Occupational group based on job description (AFSC)</b>         |         |          |                         |
| Aircraft maintenance (2A, 21A) <sup>1</sup>                       | 53      | 40       | 1.46 (0.94-2.27)        |
| Aircraft crew (12, 13, 1A, 2A) <sup>1</sup>                       | 22      | 37       | 0.59 (0.33-1.05)        |
| Ammunition (3E, 2W)                                               | 23      | 34       | 0.96 (0.53-1.73)        |
| Fuels/petroleum (2A, 2F, 63) <sup>1</sup>                         | 15      | 9        | 2.04 (0.84-4.96)        |
| Electrical/electronics (2A, 2E, 2P, 3D, 3E)                       | 19      | 26       | 0.66 (0.35-1.26)        |
| Mechanic/Other maintenance (2A, 2E, 2M, 2T, 3E, 4A)               | 18      | 26       | 0.63 (0.33-1.19)        |
| Law enforcement/Security (3P, 31P, 81) <sup>1</sup>               | 28      | 31       | 1.04 (0.60-1.83)        |
| Radio/Communications/Radar (1C, 2A, 2E, 3C, 3D, 33S) <sup>1</sup> | 21      | 22       | 0.94 (0.51-1.75)        |
| Medical <sup>1,2</sup>                                            | 27      | 25       | 1.07 (0.60-1.93)        |
| Administrative/Support <sup>1,3</sup>                             | 120     | 108      | 1.13 (0.82-1.56)        |
| Miscellaneous/Other/Unknown <sup>1,4</sup>                        | 30      | 39       | 0.78 (0.47-1.29)        |

All conditional logistic regression models adjusted for number of deployments before case diagnosis (0, 1, 2+)

<sup>1</sup>Models additionally adjusted for grade at case diagnosis

<sup>2</sup>Medical AFSCs: 42, 44, 45, 46, 47, 48, 4C, 4D, 4F, 4N, 4P, 4R, 4Y, 92M1

<sup>3</sup>Administrative/Support AFSCs: 13,16,17,18,20, 21,27, 43,51,60,62,63, 64, 65, 97, 10C, 14N, 1C, 1N, 1W, 21R, 2E, 2G, 2R, 2S, 2T, 32E, 33S, 34M, 36M, 36P, 38F, 38P, 3A, 3C, 3D, 3M, 3N, 3S, 3V, 41A, 4A, 4E, 52R, 5R, 6C, 6F, 7S, 8R, 8M000, 9E

<sup>4</sup>Miscellaneous/Other/Unknown AFSCs: 45, 61, 62, 15W, 1C, 1P, 1S, 1T, 1U, 2A, 2E, 2T, 2W, 3E, 4B, 8F, 9S, 90G0, 9T000

**Abbreviations:** AFSC =Air Force Specialty Code; OR = Odds Ratio; CI = Confidence Interval; TGCT = Testicular germ cell tumors

Bold indicative of statistical significance

NOTE: Comparison (non-exposed) group is everyone not in selected occupation/occupational group

**Supplemental Table 4. Case-control associations between occupation at case diagnosis and TGCT among U.S. Airforce servicemen without missing height information**

| Occupation (AFSC)                                                 | Cases   | Controls | OR (95% CI)        | OR <sup>1</sup> (95% CI) |
|-------------------------------------------------------------------|---------|----------|--------------------|--------------------------|
|                                                                   | (N=340) | (N=349)  |                    |                          |
| Aircrew operations (1A)                                           | 8       | 13       | 0.75 (0.30-1.86)   | 0.73 (0.29-1.82)         |
| Command and control systems operations (1C)                       | 9       | 11       | 0.63 (0.25-1.64)   | 0.60 (0.23-1.55)         |
| Aerospace maintenance (2A)                                        | 80      | 70       | 1.33 (0.91-1.94)   | 1.33 (0.91-1.95)         |
| Fuels (2F)                                                        | 9       | 8        | 1.33 (0.49-3.58)   | 1.32 (0.49-3.58)         |
| Material management (2S)                                          | 7       | 8        | 0.92 (0.33-2.56)   | 0.95 (0.34-2.64)         |
| Transportation (2T)                                               | 16      | 19       | 0.88 (0.43-1.79)   | 0.88 (0.43-1.81)         |
| Munitions and weapons (2W)                                        | 20      | 33       | 0.55 (0.30-1.01)   | 0.55 (0.30-1.02)         |
| Communication-Electronics/Wire Systems Maintenance (2E)           | 9       | 9        | 1.01 (0.40-2.56)   | 1.04 (0.41-2.62)         |
| Communications/network (3C)                                       | 5       | 8        | 0.56 (0.16-1.92)   | 0.59 (0.17-2.03)         |
| Cyberspace support (3D)                                           | 22      | 18       | 1.10 (0.55-2.20)   | 1.13 (0.56-2.26)         |
| Security forces (3P)                                              | 36      | 34       | 1.06 (0.63-1.78)   | 1.06 (0.63-1.79)         |
| Fire protection (3E7X1)                                           | 11      | 4        | 3.54 (0.98-12.73)* | 3.28 (0.91-11.88)*       |
| Aerospace medical/surgical service (4N)                           | 8       | 9        | 1.21 (0.43-3.36)   | 1.20 (0.43-3.34)         |
| Pilot (11)                                                        | 3       | 4        | -                  | -                        |
| Fixed-wing pilot (11A, 11K, 11M, 11R, 11S, 11T)                   | 1       | 3        | -                  | -                        |
| Fighter pilot (11F)                                               | 2       | 1        | -                  | -                        |
| Pilot Trainee (92T0)                                              | 3       | 1        | -                  | -                        |
| Pilot/pilot trainee (11, 92T0)                                    | 6       | 5        | 2.47 (0.49-12.5)   | 2.36 (0.46-12.07)        |
| Space, nuclear, and missile (13)                                  | 3       | 3        | -                  | -                        |
| Civil engineer (3E, 32E) <sup>2</sup>                             | 31      | 24       | 1.43 (0.80-2.53)   | 1.38 (0.78-2.46)         |
| Intelligence (1N, 14N) <sup>2</sup>                               | 13      | 19       | 0.73 (0.35-1.55)   | 0.75 (0.35-1.58)         |
| <b>Occupational group based on job description (AFSC)</b>         |         |          |                    |                          |
| Aircraft maintenance (2A, 21A) <sup>2</sup>                       | 50      | 36       | 1.42 (0.90-2.26)   | 1.44 (0.91-2.30)         |
| Aircraft crew (12, 13, 1A, 2A) <sup>2</sup>                       | 13      | 18       | 0.84 (0.38-1.82)   | 0.82 (0.37-1.79)         |
| Ammunition (3E, 2W)                                               | 21      | 32       | 0.61 (0.34-1.11)   | 0.62 (0.34-1.11)         |
| Fuels/petroleum (2A, 2F, 63) <sup>2</sup>                         | 12      | 11       | 1.27 (0.55-2.97)   | 1.25 (0.54-2.93)         |
| Electrical/electronics (2A, 2E, 2P, 3D, 3E)                       | 18      | 25       | 0.91 (0.43-1.94)   | 0.94 (0.44-2.00)         |
| Mechanic/Other maintenance (2A, 2E, 2M, 2T, 3E, 4A)               | 16      | 19       | 0.76 (0.34-1.68)   | 0.76 (0.34-1.69)         |
| Law enforcement/Security (3P, 31P, 81) <sup>2</sup>               | 36      | 34       | 1.08 (0.64-1.82)   | 1.08 (0.64-1.82)         |
| Radio/Communications/Radar (1C, 2A, 2E, 3C, 3D, 33S) <sup>2</sup> | 17      | 12       | 1.26 (0.57-2.78)   | 1.30 (0.58-2.88)         |
| Medical <sup>2,3</sup>                                            | 21      | 20       | 1.19 (0.53-2.67)   | 1.18 (0.53-2.67)         |
| Administrative/Support <sup>2,4</sup>                             | 79      | 86       | 0.81 (0.55-1.18)   | 0.82 (0.56-1.20)         |
| Miscellaneous/Other/Unknown <sup>2,5</sup>                        | 35      | 37       | 1.06 (0.62-1.83)   | 1.04 (0.60-1.79)         |

All conditional logistic regression models adjusted for number of deployments before case diagnosis (0, 1, 2+)

<sup>1</sup>Models additionally adjusted for height in centimeters

<sup>2</sup>Models additionally adjusted for grade at case diagnosis

<sup>3</sup>Medical AFSCs: 42, 44, 45, 46, 47, 48, 4C, 4D, 4F, 4N, 4P, 4R, 4Y, 92M1

<sup>4</sup>Administrative/Support AFSCs: 13, 16, 17, 18, 20, 21, 27, 43, 51, 60, 62, 63, 64, 65, 97, 10C, 14N, 1C, 1N, 1W, 21R, 2E, 2G, 2R, 2S, 2T, 32E, 33S, 34M, 36M, 36P, 38F, 38P, 3A, 3C, 3D, 3M, 3N, 3S, 3V, 41A, 4A, 4E, 52R, 5R, 6C, 6F, 7S, 8R, 8M000, 9E

<sup>5</sup>Miscellaneous/Other/Unknown AFSCs: 45, 61, 62, 15W, 1C, 1P, 1S, 1T, 1U, 2A, 2E, 2T, 2W, 3E, 4B, 8F, 9S, 90G0, 9T000

\*Odds ratios based on <5 controls with fire protection jobs

**Abbreviations:** AFSC = Air Force Specialty Code; OR = Odds Ratio; CI = Confidence Interval; TGCT = Testicular germ cell tumors

Bold indicative of statistical significance

NOTE: Comparison (non-exposed) group is everyone not in selected occupation/occupational group
